# Supplementary material for: The Profiles and Correlates of Psychopathology in Adolescents and Adults with Williams, Fragile X and Prader–Willi Syndromes
Source: Springer Nature journal article supplement (doi:10.1007/s10803-019-04317-1), 2019-12-04
Supplement: MOESM1 [file 17470172]

**THE PROFILES AND CORRELATES OF PSYCHOPATHOLOGY IN  
ADOLESCENTS AND ADULTS WITH WILLIAMS, FRAGILE X AND  
PRADER-WILLI SYNDROMES**

*(withheld for blinded review)*

Journal of Autism and Developmental Disorders

**Supplemental Material**

Online Resource A

**Supplemental Table 1** Correlations between the ADAMS subscales for Williams syndrome, Fragile X syndrome and Prader-Willi syndrome

|                              | Depressed Mood | General Anxiety | Manic/<br>hyperactivity | Obsessive-<br>compulsive | Social Avoidance | ADAMS total |
|------------------------------|----------------|-----------------|-------------------------|--------------------------|------------------|-------------|
| <b>Williams syndrome</b>     |                |                 |                         |                          |                  |             |
| <i>Depressed mood</i>        | -              | .71**           | .61**                   | .40                      | .47*             | .81**       |
| <i>General anxiety</i>       |                | -               | .76**                   | .51*                     | .57**            | .89**       |
| <i>Manic/hyperactivity</i>   |                |                 | -                       | .49*                     | .66**            | .85**       |
| <i>Obsessive-compulsive</i>  |                |                 |                         | -                        | .69**            | .69**       |
| <i>Social Avoidance</i>      |                |                 |                         |                          | -                | .78**       |
| <i>ADAMS total</i>           |                |                 |                         |                          |                  | -           |
| <b>Fragile X syndrome</b>    |                |                 |                         |                          |                  |             |
| <i>Depressed mood</i>        | -              | .72**           | .53**                   | .39*                     | .28              | .71**       |
| <i>General anxiety</i>       |                | -               | .63**                   | .54**                    | .41*             | .86**       |
| <i>Manic/hyperactivity</i>   |                |                 | -                       | .59**                    | .52**            | .84**       |
| <i>Obsessive-compulsive</i>  |                |                 |                         | -                        | .32              | .72**       |
| <i>Social Avoidance</i>      |                |                 |                         |                          | -                | .68**       |
| <i>ADAMS total</i>           |                |                 |                         |                          |                  | -           |
| <b>Prader-Willi syndrome</b> |                |                 |                         |                          |                  |             |
| <i>Depressed mood</i>        | -              | .88**           | .69**                   | .67**                    | .67**            | .94**       |
| <i>General anxiety</i>       |                | -               | .79**                   | .66**                    | .72**            | .95**       |
| <i>Manic/hyperactivity</i>   |                |                 | -                       | .59*                     | .51*             | .82**       |
| <i>Obsessive-compulsive</i>  |                |                 |                         | -                        | .47              | .74**       |
| <i>Social Avoidance</i>      |                |                 |                         |                          | -                | .77**       |
| <i>ADAMS total</i>           |                |                 |                         |                          |                  | -           |

\*p<.01, \*\*p<.0001

## Online Resource B

**Supplemental Table 2** Spearman's rho correlations between the ADAMS subscales and DBC mean item and intensity scores (n=110)

|                        | <b>ADAMS subscales</b> |                     |                   |                      |                  |       |
|------------------------|------------------------|---------------------|-------------------|----------------------|------------------|-------|
|                        | Depressed mood         | Generalised anxiety | Manic/hyperactive | Obsessive compulsive | Social avoidance | Total |
| <b>DBC score</b>       |                        |                     |                   |                      |                  |       |
| <i>Mean item score</i> | .53**                  | .67**               | .75**             | .64**                | .51**            | .80** |
| <i>Intensity score</i> | .37**                  | .53**               | .65**             | .60**                | .46**            | .67** |

\*\*p<.0001

### Online Resource C

**Supplemental Table 3** Group differences between Williams syndrome (n=35), fragile X syndrome (n=49) and Prader-willi syndrome (n=26) for age, gender, level of independence, auditory sensory processing, health and emotional/behavioural measures

|                                     |                   | <b>WS</b>             | <b>FXS</b>            | <b>PWS</b>           | F/x <sup>2</sup> | P value<br><.01 | ε <sup>2</sup>   | Post hoc tests<br><.01 |
|-------------------------------------|-------------------|-----------------------|-----------------------|----------------------|------------------|-----------------|------------------|------------------------|
| <b>Age</b>                          | Med (IR)<br>range | 21.0 (45)<br>12-57    | 24.0 (12)<br>12-50    | 25.5 (15)<br>12-47   | 1.93             | .381            |                  |                        |
| <b>Gender</b>                       | % of males        | 40                    | 100                   | 42                   | 43.02            | <.0001          | .63 <sup>a</sup> | FXS>PWS, WS            |
| <b>WADL total score</b>             | M (SD)<br>range   | 18.37 (6.24)<br>6-28  | 18.87 (5.45)<br>9-29  | 17.50 (5.84)<br>4-29 | .47              | .626            |                  |                        |
| <b>SEQ auditory score</b>           |                   | 18.69 (3.36)<br>13-25 | 17.64 (3.88)<br>10-26 | 13.19 (3.12)<br>8-20 | 19.67            | <.0001          | .27 <sup>b</sup> | FXS, WS> PWS           |
| <b>Health</b>                       |                   |                       |                       |                      |                  |                 |                  |                        |
| <i>Lifetime overall scores</i>      | Med (IR)<br>range | 9.0 (4.0)<br>2-22     | 5.0 (3.0)<br>0-16     | 6.0 (8.0)<br>1-23    | 23.90            | <.0001          | .22              | WS>FXS                 |
| <i>Lifetime no. of difficulties</i> |                   | 6.0 (2.0)<br>2-11     | 3.0 (3.0)<br>0-8      | 5.0 (4.0)<br>1-10    | 27.97            | <.0001          | .26              | PWS, WS >FXS           |
| <i>Current overall scores</i>       |                   | 3.0 (5.0)<br>0-12     | 0.0 (2.0)<br>0-16     | 2.0 (3.3)<br>0-19    | 15.15            | .001            | .14              | PWS, WS >FXS           |
| <i>Current no. of difficulties</i>  |                   | 2.0 (3.0)<br>0-8      | 0.0 (1.0)<br>0-8      | 1.0 (2.0)<br>0-10    | 18.74            | <.0001          | .17              | PWS, WS>FXS            |

<sup>a</sup> Cramer's V for effect size

<sup>b</sup> Partial eta squared ( $\eta_p^2$ ) for effect size

|                                  | <b>WS<br/>Med (IR)<br/>range</b> | <b>FXS<br/>Med (IR)<br/>range</b> | <b>PWS<br/>Med (IR)<br/>range</b> | <b>F/<math>\chi^2</math></b> | <b>P value<br/>&lt;.01</b> | <b><math>\epsilon^2</math></b> | <b>Post hoc tests<br/>&lt;.05</b> |
|----------------------------------|----------------------------------|-----------------------------------|-----------------------------------|------------------------------|----------------------------|--------------------------------|-----------------------------------|
| <b>ADAMS</b>                     |                                  |                                   |                                   |                              |                            |                                |                                   |
| <i>Depressed mood</i>            | 4.0 (7.0)<br>0-21                | 2.0 (5.0)<br>0-14                 | 5.0 (7.0)<br>0-18                 | 6.49                         | .039                       |                                |                                   |
| <i>General anxiety</i>           | 7.0 (6.0)<br>0-21                | 8.0 (7.0)<br>0-20                 | 4.0 (8.0)<br>0-12                 | 9.61                         | .008                       | .09                            | FXS, WS >PWS                      |
| <i>Manic hyperactive</i>         | 4.0 (7.0)<br>0-12                | 7.0 (7.0)<br>0-14                 | 3.0 (6.5)<br>0-12                 | 10.16                        | .006                       | .09                            | FXS> PWS                          |
| <i>Obsessive compulsive</i>      | 1.0 (3.0)<br>0-9                 | 2.0 (5.0)<br>0-9                  | 3.0 (4.0)<br>0-6                  | 1.60                         | .450                       |                                |                                   |
| <i>Social avoidance</i>          | 3.0 (5.0)<br>0-16                | 8.0 (7.0)<br>2-17                 | 2.0 (5.3)<br>0-12                 | 37.13                        | <.0001                     | .34                            | FXS>PWS, WS                       |
| <i>Total</i>                     | 18.0 (23.0)<br>1-70              | 25.0 (21.0)<br>4-66               | 18.0 (27.5)<br>0-45               | 6.61                         | .037                       |                                |                                   |
| <b>DBC A</b>                     |                                  |                                   |                                   |                              |                            |                                |                                   |
| <i>Antisocial</i>                | 4.0 (5.0)<br>0-24                | 5.0 (5.0)<br>1-12                 | 9.0 (11.0)<br>1-22                | 6.46                         | .040                       |                                |                                   |
| <i>Self-absorbed</i>             | 6.0 (8.0)<br>0-33                | 8.0 (4.0)<br>2-23                 | 6.0 (8.0)<br>1-28                 | 3.54                         | .170                       |                                |                                   |
| <i>Communication and anxiety</i> | 11.0 (10.0)<br>1-29              | 15.0 (7.75)<br>6-36               | 13.0 (12.5)<br>3-30               | 3.99                         | .136                       |                                |                                   |
| <i>Disruptive</i>                | 9.0 (11.5)<br>1-41               | 10.0 (9.50)<br>2-33               | 16.0 (14.5)<br>2-32               | 2.93                         | .231                       |                                |                                   |
| <i>Social relating</i>           | 3.0 (4.0)<br>0-13                | 8.0 (4.0)<br>3-14                 | 4.0 (4.0)<br>0-12                 | 26.96                        | <.0001                     | .32                            | FXS>PWS, WS                       |
| <i>Depressive</i>                | 5.0 (8.0)<br>0-19                | 2.0 (4.0)<br>0-20                 | 6.0 (8.0)<br>0-14                 | 5.82                         | .054                       |                                |                                   |
| <i>Total</i>                     | 38.0 (36.0)<br>5-129             | 45.5 (24.3)<br>21-107             | 47.0 (46.5)<br>12-117             | 1.86                         | .395                       |                                |                                   |

|                                 | <b>WS<br/>Med (IR)<br/>range</b> | <b>FXS<br/>Med (IR)<br/>range</b> | <b>PWS<br/>Med (IR)<br/>range</b> | F/x <sup>2</sup> | P value<br><.01 | ε <sup>2</sup> | Post hoc tests<br><.05 |
|---------------------------------|----------------------------------|-----------------------------------|-----------------------------------|------------------|-----------------|----------------|------------------------|
| <b>DBC P<sup>c</sup></b>        |                                  |                                   |                                   |                  |                 |                |                        |
|                                 | 14.5 (19.5)                      | 30.0 (23.8)                       | 10.0 (22.5)                       |                  |                 |                |                        |
| <i>Disruptive/ antisocial</i>   | 2-32                             | 8-40                              | 3-31                              |                  |                 |                |                        |
|                                 | 9.0 (15.0)                       | 31.5 (29.8)                       | 7.0 (25.5)                        |                  |                 |                |                        |
| <i>Self-absorbed</i>            | 2-36                             | 7-45                              | 2-42                              |                  |                 |                |                        |
|                                 | 8.5 (5.8)                        | 17.5 (18.3)                       | 8.0 (10.0)                        |                  |                 |                |                        |
| <i>Communication</i>            | 2-17                             | 3-25                              | 1-16                              |                  |                 |                |                        |
|                                 | 5.0 (5.0)                        | 6.0 (5.0)                         | 3.0 (3.0)                         |                  |                 |                |                        |
| <i>Anxiety</i>                  | 0-10                             | 4-12                              | 1-5                               |                  |                 |                |                        |
|                                 | 3.5 (5.5)                        | 7.5 (7.3)                         | 5.0 (3.0)                         |                  |                 |                |                        |
| <i>Social relating</i>          | 0-13                             | 4-12                              | 0-5                               |                  |                 |                |                        |
|                                 | 45.0 (45.0)                      | 96.5 (83.0)                       | 35.0 (60.5)                       |                  |                 |                |                        |
| <i>Total</i>                    | 11-107                           | 31-126                            | 8-101                             |                  |                 |                |                        |
| <b>DBC Combined scores</b>      |                                  |                                   |                                   |                  |                 |                |                        |
| <i>Mean item score</i>          | .36 (.40)                        | .45 (.29)                         | .43 (.42)                         | 2.40             | .301            |                |                        |
|                                 | .05-1.21                         | .06-1.31                          | .08-1.09                          |                  |                 |                |                        |
| <i>Positively checked items</i> | .18 (.20)                        | .22 (.15)                         | .21 (.21)                         | 2.39             | .303            |                |                        |
|                                 | .02-.60                          | .03-.66                           | .04-.55                           |                  |                 |                |                        |
| <i>Intensity score</i>          | .06 (.14)                        | .10 (.12)                         | .08 (.20)                         | 1.90             | .387            |                |                        |
|                                 | .00-.50                          | .00-.60                           | .00-.40                           |                  |                 |                |                        |
| <b>Anxiety triggers</b>         |                                  |                                   |                                   |                  |                 |                |                        |
| <i>Total score</i>              | 46.0 (31.3)                      | 44.4 (30.3)                       | 20.5 (30.0)                       | 18.42            | <.0001          | .17            | FXS, WS><br>PWS        |
|                                 | 11-87                            | 7-93                              | 0-64                              |                  |                 |                |                        |
| <b>Setting events %</b>         |                                  |                                   |                                   |                  |                 |                |                        |
| <i>Tiredness</i>                | 50                               | 44                                | 69                                | 4.41             | 3.49            |                |                        |
| <i>Pain/illness</i>             | 65                               | 45                                | 46                                | 3.49             | .174            |                |                        |
| <i>Hunger</i>                   | 41                               | 46                                | 85                                | 13.21            | .001            | .14            | PWS> FXS,<br>WS        |
| <i>Negative Mood</i>            | 59                               | 52                                | 62                                | .72              | .699            |                |                        |

## Online Resource D

Regression linear models of predictors of mental health difficulties for Williams syndrome, Fragile X syndrome and Prader-Willi syndrome.

### Williams syndrome

**Supplemental Table 4 WS - Total Anxiety, Depression and Mood score** Linear model of predictors of total anxiety, depression and mood score, with 95% bias corrected and accelerated confidence intervals reported in parentheses. Confidence intervals and standard errors based on 1000 bootstrap samples.

|                     | b                            | SE B   | $\beta$ | p           |
|---------------------|------------------------------|--------|---------|-------------|
| <b>Step 1</b>       |                              |        |         |             |
| Constant            | 41.97<br>(21.05, 70.96)      | 12.20  |         | <b>.001</b> |
| Age                 | -100.10<br>(-361.33, 174.39) | 137.63 | -.13    | .449        |
| Adaptive ability    | -0.76<br>(-1.60, -0.11)      | 0.45   | -.28    | .100        |
| <b>Step 2</b>       |                              |        |         |             |
| Constant            | -24.08<br>(-71.33, 71.20)    | 23.85  |         | .220        |
| Age                 | -161.72<br>(-383.62, 26.85)  | 101.86 | -.20    | .101        |
| Adaptive ability    | 0.03<br>(-0.78, 0.55)        | 0.49   | .01     | .948        |
| Lifetime health     | 0.29<br>(-0.78, 1.67)        | 0.55   | .08     | .544        |
| Current health      | 2.50<br>(0.22, 4.51)         | 0.94   | .50     | .014        |
| Auditory processing | 2.31<br>(0.83, 3.41)         | 0.96   | .46     | .012        |

**Supplemental Table 5 WS - Depressed mood** Linear model of predictors of depressed mood, with 95% bias corrected and accelerated confidence intervals reported in parentheses. Confidence intervals and standard errors based on 1000 bootstrap samples.

|                     | b                          | SE B  | $\beta$ | p    |
|---------------------|----------------------------|-------|---------|------|
| <b>Step 1</b>       |                            |       |         |      |
| Constant            | 10.55<br>(3.46, 19.75)     | 4.01  |         | .018 |
| Age                 | -50.87<br>(-14.71, 44.20)  | 46.17 | -.22    | .279 |
| Adaptive ability    | -0.16<br>(-0.43, 0.04)     | 0.12  | -.21    | .199 |
| <b>Step 2</b>       |                            |       |         |      |
| Constant            | .063<br>(-17.16, 22.92)    | 7.76  |         | .993 |
| Age                 | -53.31<br>(-132.80, 14.49) | 32.77 | -.23    | .106 |
| Adaptive ability    | -0.09<br>(-0.35, 0.11)     | 0.15  | -.12    | .492 |
| Lifetime health     | 0.22<br>(-0.14, 0.63)      | 0.17  | .21     | .169 |
| Current health      | 0.72<br>(0.05, 1.14)       | 0.28  | .50     | .018 |
| Auditory processing | 0.25<br>(-0.32, 0.72)      | 0.30  | .18     | .367 |



**Supplemental Table 6 WS - General anxiety** Linear model of predictors of generalised anxiety, with 95% bias corrected and accelerated confidence intervals reported in parentheses. Confidence intervals and standard errors based on 1000 bootstrap samples.

|                     | b                          | SE B  | $\beta$ | p           |
|---------------------|----------------------------|-------|---------|-------------|
| <b>Step 1</b>       |                            |       |         |             |
| Constant            | 12.99<br>(6.62, 21.48)     | 3.29  |         | <b>.002</b> |
| Age                 | -31.22<br>(-107.23, 58.61) | 42.65 | -.13    | .204        |
| Adaptive ability    | -0.19<br>(-0.43, 0.01)     | 0.13  | -.23    | .479        |
| <b>Step 2</b>       |                            |       |         |             |
| Constant            | -4.16<br>(-16.74, 21.32)   | 8.00  |         | .596        |
| Age                 | -36.68<br>(-101.43, 30.22) | 34.63 | -.15    | .869        |
| Adaptive ability    | -0.03<br>(-0.43, 0.01)     | 0.17  | -.03    | .323        |
| Lifetime health     | 0.28<br>(-0.10, 0.67)      | -.20  | .25     | .141        |
| Current health      | 0.59<br>(-0.12, 1.22)      | 0.31  | .39     | .026        |
| Auditory processing | 0.52<br>(-0.08, 0.87)      | 0.30  | .34     | .085        |

**Supplemental Table 7 WS - Manic/Hyperactivity** Linear model of predictors of manic/hyperactivity, with 95% bias corrected and accelerated confidence intervals reported in parentheses. Confidence intervals and standard errors based on 1000 bootstrap samples.

|                     | b                        | SE B  | $\beta$ | p    |
|---------------------|--------------------------|-------|---------|------|
| <b>Step 1</b>       |                          |       |         |      |
| Constant            | 7.43<br>(0.69, 15.04)    | 3.77  |         | .016 |
| Age                 | 12.29<br>(-60.11, 92.21) | 38.99 | .07     | .706 |
| Adaptive ability    | -0.17<br>(-0.46, 0.08)   | 0.13  | -.28    | .123 |
| <b>Step 2</b>       |                          |       |         |      |
| Constant            | -6.83<br>(-19.03, 16.65) | 8.09  |         | .273 |
| Age                 | 7.52<br>(-47.32, 53.79)  | 32.20 | .04     | .795 |
| Adaptive ability    | -0.02<br>(-0.36, 0.17)   | 0.16  | -.04    | .850 |
| Lifetime health     | 0.21<br>(-0.02, 0.44)    | 0.14  | .26     | .153 |
| Current health      | 0.31<br>(0.22, 0.77)     | 0.22  | .27     | .132 |
| Auditory processing | 0.47<br>(-0.07, 0.76)    | 0.27  | .41     | .052 |

**Supplemental Table 8 WS - Obsessive Compulsive** Linear model of predictors of obsessive compulsive, with 95% bias corrected and accelerated confidence intervals reported in parentheses. Confidence intervals and standard errors based on 1000 bootstrap samples.

|                     | b                         | SE B  | $\beta$ | p    |
|---------------------|---------------------------|-------|---------|------|
| <b>Step 1</b>       |                           |       |         |      |
| Constant            | 4.32<br>(1.28, 8.40)      | 1.78  |         | .021 |
| Age                 | -22.11<br>(-59.92, 16.69) | 19.47 | -.19    | .226 |
| Adaptive ability    | -0.06<br>(-0.19, 0.05)    | 0.07  | -.16    | .390 |
| <b>Step 2</b>       |                           |       |         |      |
| Constant            | -0.44<br>(-9.55, 9.66)    | 3.94  |         | .898 |
| Age                 | -37.33<br>(-79.04, -1.36) | 20.80 | -.32    | .069 |
| Adaptive ability    | 0.03<br>(-0.13, -0.17)    | 0.09  | .07     | .725 |
| Lifetime health     | -0.18<br>(-0.38, 0.07)    | 0.10  | -.33    | .095 |
| Current health      | 0.35<br>(-0.04, 0.61)     | 0.16  | .47     | .041 |
| Auditory processing | 0.23<br>(-0.07, 0.50)     | 0.16  | .31     | .148 |

**Supplemental Table 9 WS - Social Avoidance** Linear model of predictors of social avoidance, with 95% bias corrected and accelerated confidence intervals reported in parentheses. Confidence intervals and standard errors based on 1000 bootstrap samples.

|                     | b                         | SE B  | $\beta$ | p           |
|---------------------|---------------------------|-------|---------|-------------|
| <b>Step 1</b>       |                           |       |         |             |
| Constant            | 6.15<br>(2.54, 10.58)     | 1.99  |         | <b>.010</b> |
| Age                 | -5.31<br>(-50.70, 52.36)  | 26.67 | -.03    | .838        |
| Adaptive ability    | -0.15<br>(-0.30, -0.03)   | -0.08 | -.29    | .057        |
| <b>Step 2</b>       |                           |       |         |             |
| Constant            | -12.42<br>(-25.19, 2.98)  | 5.04  |         | .012        |
| Age                 | -30.78<br>(-78.15, 16.35) | 22.35 | -.19    | .170        |
| Adaptive ability    | -0.11<br>(-0.06, 0.25)    | 0.10  | .21     | .261        |
| Lifetime health     | 0.42<br>(-0.33, 0.24)     | 0.13  | -.12    | .515        |
| Current health      | -0.09<br>(-0.08, 0.76)    | 0.24  | .42     | .077        |
| Auditory processing | 0.77<br>(0.41, 1.04)      | 0.20  | .76     | <b>.001</b> |

**Supplemental Table 10 WS - DBC MIS** Linear model of predictors of DBC MIS, with 95% bias corrected and accelerated confidence intervals reported in parentheses. Confidence intervals and standard errors based on 1000 bootstrap samples.

|                     | b                       | SE B | $\beta$ | p           |
|---------------------|-------------------------|------|---------|-------------|
| <b>Step 1</b>       |                         |      |         |             |
| Constant            | 0.62<br>(0.14, 1.19)    | 0.24 |         | <b>.008</b> |
| Age                 | 2.19<br>(-2.10, 7.25)   | 2.43 | .16     | .368        |
| Adaptive ability    | -0.02<br>(-0.03, -0.00) | 0.01 | -.32    | .084        |
| <b>Step 2</b>       |                         |      |         |             |
| Constant            | -0.63<br>(-1.39, 1.05)  | 0.44 |         | .076        |
| Age                 | 1.01<br>(-2.24, 3.99)   | 1.60 | .07     | .494        |
| Adaptive ability    | 0.00<br>(-0.01, 0.01)   | 0.01 | .04     | .786        |
| Lifetime health     | 0.00<br>(-0.02, 0.02)   | 0.01 | -.01    | .961        |
| Current health      | 0.05<br>(0.02, 0.09)    | 0.01 | .52     | <b>.001</b> |
| Auditory processing | 0.04<br>(0.01, 0.06)    | 0.02 | .50     | <b>.008</b> |

**Supplemental Table 11 WS - DBC II** Linear model of predictors of DBC II, with 95% bias corrected and accelerated confidence intervals reported in parentheses. Confidence intervals and standard errors based on 1000 bootstrap samples.

|                     | b                      | SE B | $\beta$ | p           |
|---------------------|------------------------|------|---------|-------------|
| <b>Step 1</b>       |                        |      |         |             |
| Constant            | 0.18<br>(0.01, 0.41)   | 0.11 |         | .094        |
| Age                 | 1.06<br>(-0.71, 3.27)  | 0.99 | .17     | .275        |
| Adaptive ability    | -0.01<br>(-0.02, 0.00) | 0.00 | -.28    | .108        |
| <b>Step 2</b>       |                        |      |         |             |
| Constant            | -0.31<br>(-0.73, 0.29) | 0.19 |         | .064        |
| Age                 | 0.29<br>(-1.49, 2.15)  | 0.79 | .05     | .678        |
| Adaptive ability    | 0.00<br>(-0.01, 0.01)  | 0.00 | .08     | .624        |
| Lifetime health     | -0.01<br>(-0.02, 0.00) | 0.01 | -.22    | .149        |
| Current health      | 0.02<br>(0.01, 0.04)   | 0.01 | .55     | <b>.009</b> |
| Auditory processing | 0.02<br>(0.01, 0.03)   | 0.01 | .49     | .013        |

## Fragile X syndrome

**Supplemental Table 12 FXS - Total Anxiety, Depression and Mood score** Linear model of predictors of total anxiety, depression and mood score, with 95% bias corrected and accelerated confidence intervals reported in parentheses. Confidence intervals and standard errors based on 1000 bootstrap samples.

|                     | b                          | SE B   | $\beta$ | p           |
|---------------------|----------------------------|--------|---------|-------------|
| <b>Step 1</b>       |                            |        |         |             |
| Constant            | 35.79<br>(13.92-59.46)     | 11.48  |         | <b>.003</b> |
| Age                 | -32.29<br>(-334.23-267.17) | 142.93 | -.04    | .816        |
| Adaptive ability    | -0.36<br>(-1.16-0.41)      | 0.40   | -.14    | .370        |
| <b>Step 2</b>       |                            |        |         |             |
| Constant            | 12.85<br>(-23.52-56.37)    | 16.09  |         | .368        |
| Age                 | -37.07<br>(-300.80-154.88) | 147.04 | -.04    | .793        |
| Adaptive ability    | -0.02<br>(-0.82-0.66)      | 0.44   | .01     | .969        |
| Lifetime health     | 0.83<br>(-0.89-2.45)       | 0.83   | .20     | .329        |
| Current health      | 0.67<br>(-1.46-5.70)       | 1.34   | .13     | .524        |
| Auditory processing | 0.67<br>(-0.43-1.59)       | 0.57   | .17     | .230        |

**Supplemental Table 13 FXS - Depressed Mood** Linear model of predictors of depressed mood score, with 95% bias corrected and accelerated confidence intervals reported in parentheses. Confidence intervals and standard errors based on 1000 bootstrap samples.

|                     | B (95% CIs)             | SE B  | $\beta$ | p    |
|---------------------|-------------------------|-------|---------|------|
| <b>Step 1</b>       |                         |       |         |      |
| Constant            | 2.11<br>(-2.44-6.31)    | 2.26  |         | .347 |
| Age                 | -3.93<br>(-52.35-60.12) | 27.55 | -.02    | .873 |
| Adaptive ability    | 0.04<br>(-0.10-0.19)    | 0.07  | .07     | .607 |
| <b>Step 2</b>       |                         |       |         |      |
| Constant            | -2.62<br>(-13.19-6.22)  | 4.06  |         | .531 |
| Age                 | -2.41<br>(-61.02-46.31) | 33.97 | -.01    | .932 |
| Adaptive ability    | 0.12<br>(-0.01-0.26)    | 0.09  | .22     | .178 |
| Lifetime health     | 0.13<br>(-0.23-0.53)    | 0.17  | .16     | .411 |
| Current health      | 0.25<br>(-0.20-1.38)    | 0.35  | .23     | .346 |
| Auditory processing | 0.12<br>(-0.16-0.39)    | 0.15  | .15     | .442 |



**Supplemental Table 14 FXS - General anxiety** Linear model of predictors of generalised anxiety score, with 95% bias corrected and accelerated confidence intervals reported in parentheses. Confidence intervals and standard errors based on 1000 bootstrap samples.

|                     | B (95% CIs)              | SE B  | $\beta$ | p    |
|---------------------|--------------------------|-------|---------|------|
| <b>Step 1</b>       |                          |       |         |      |
| Constant            | 7.18<br>(-0.41-14.26)    | 3.93  |         | .061 |
| Age                 | 14.45<br>(-71.14-105.62) | 45.06 | .05     | .718 |
| Adaptive ability    | -0.01<br>(-0.28-0.29)    | 0.14  | -.02    | .917 |
| <b>Step 2</b>       |                          |       |         |      |
| Constant            | -2.00<br>(-14.06-9.86)   | 5.22  |         | .682 |
| Age                 | 12.60<br>(-60.81-72.64)  | 45.72 | .04     | .797 |
| Adaptive ability    | 0.10<br>(-0.15-0.37)     | 0.14  | .12     | .466 |
| Lifetime health     | 0.30<br>(-0.27-0.83)     | 0.27  | .23     | .275 |
| Current health      | 0.08<br>(-0.69-1.63)     | 0.46  | .05     | .815 |
| Auditory processing | 0.31<br>(-0.03-0.65)     | 0.18  | .24     | .090 |

**Supplemental Table 15 FXS - Manic/Hyperactivity** Linear model of predictors of manic hyperactive score, with 95% bias corrected and accelerated confidence intervals reported in parentheses. Confidence intervals and standard errors based on 1000 bootstrap samples.

|                     | B (95% CIs)              | SE B  | $\beta$ | p           |
|---------------------|--------------------------|-------|---------|-------------|
| <b>Step 1</b>       |                          |       |         |             |
| Constant            | 9.00<br>(2.94-15.61)     | 2.97  |         | <b>.002</b> |
| Age                 | 23.43<br>(-66.63-100.40) | 42.87 | .09     | .584        |
| Adaptive ability    | -0.16<br>(-0.37-0.02)    | 0.10  | -.22    | .111        |
| <b>Step 2</b>       |                          |       |         |             |
| Constant            | 5.45<br>(-6.26-16.57)    | 4.54  |         | .219        |
| Age                 | 23.58<br>(-61.19-81.29)  | 45.65 | .09     | .594        |
| Adaptive ability    | -0.10<br>(-0.31-0.11)    | 0.12  | -.13    | .401        |
| Lifetime health     | 0.12<br>(-0.31, 0.50)    | 0.21  | .11     | .562        |
| Current health      | 0.28<br>(-0.32-1.41)     | 0.34  | .19     | .291        |
| Auditory processing | 0.07<br>(-0.20-0.33)     | 0.15  | .07     | .607        |

**Supplemental Table 16 FXS - Obsessive Compulsive** Linear model of predictors of obsessive compulsive score, with 95% bias corrected and accelerated confidence intervals reported in parentheses. Confidence intervals and standard errors based on 1000 bootstrap samples.

|                     | B (95% CIs)              | SE B  | $\beta$ | p    |
|---------------------|--------------------------|-------|---------|------|
| <b>Step 1</b>       |                          |       |         |      |
| Constant            | 2.74<br>(-2.81-7.69)     | 2.57  |         | .271 |
| Age                 | 31.39<br>(-33.13-103.69) | 33.57 | .16     | .341 |
| Adaptive ability    | -0.06<br>(-0.21-0.11)    | 0.08  | -.11    | .470 |
| <b>Step 2</b>       |                          |       |         |      |
| Constant            | -2.72<br>(-11.59-6.98)   | 3.60  |         | .426 |
| Age                 | 28.80<br>(-32.57-71.99)  | 33.31 | .15     | .403 |
| Adaptive ability    | 0.02<br>(-0.15-0.18)     | 0.09  | .03     | .855 |
| Lifetime health     | 0.24<br>(-0.06-0.59)     | 0.15  | .28     | .110 |
| Current health      | 0.10<br>(-0.33-0.93)     | 0.26  | .09     | .645 |
| Auditory processing | 0.16<br>(-0.06-0.34)     | 0.12  | .20     | .192 |

**Supplemental Table 17 FXS - Social Avoidance** Linear model of predictors of social avoidance score, with 95% bias corrected and accelerated confidence intervals reported in parentheses. Confidence intervals and standard errors based on 1000 bootstrap samples.

|                     | B (95% CIs)               | SE B  | $\beta$ | p           |
|---------------------|---------------------------|-------|---------|-------------|
| <b>Step 1</b>       |                           |       |         |             |
| Constant            | 13.06<br>(5.81-20.73)     | 3.84  |         | <b>.003</b> |
| Age                 | -69.93<br>(-157.91-24.38) | 46.36 | -.26    | .131        |
| Adaptive ability    | -0.09<br>(-0.34-0.13)     | 0.12  | -.12    | .499        |
| <b>Step 2</b>       |                           |       |         |             |
| Constant            | 10.21<br>(-0.45-23.10)    | 5.70  |         | .070        |
| Age                 | -71.61<br>(-167.08-22.22) | 48.99 | -.27    | .141        |
| Adaptive ability    | -0.05<br>(-0.33-0.21)     | 0.14  | -.06    | .759        |
| Lifetime health     | 0.14<br>(-0.32-0.64)      | 0.23  | .12     | .550        |
| Current health      | 0.07<br>(-0.52-0.83)      | 0.33  | .05     | .770        |
| Auditory processing | 0.08<br>(-0.35-0.40)      | 0.19  | .07     | .692        |

**Supplemental Table 18 FXS - DBC MIS** Linear model of predictors of DBC MIS score, with 95% bias corrected and accelerated confidence intervals reported in parentheses. Confidence intervals and standard errors based on 1000 bootstrap samples.

|                     | B (95% CIs)           | SE B | $\beta$ | p    |
|---------------------|-----------------------|------|---------|------|
| <b>Step 1</b>       |                       |      |         |      |
| Constant            | 0.25<br>(-0.11-0.65)  | 0.20 |         | .211 |
| Age                 | 6.92<br>(0.89-12.62)  | 3.18 | .41     | .037 |
| Adaptive ability    | -0.00<br>(-0.01-0.01) | 0.01 | -.04    | .771 |
| <b>Step 2</b>       |                       |      |         |      |
| Constant            | -0.04<br>(-0.64-0.74) | 0.29 |         | .887 |
| Age                 | 4.49<br>(-0.94-8.82)  | 2.92 | .26     | .137 |
| Adaptive ability    | 0.00<br>(-0.01-0.01)  | 0.01 | .03     | .826 |
| Lifetime health     | 0.03<br>(-0.01-0.05)  | 0.02 | .30     | .087 |
| Current health      | 0.03<br>(-0.03-0.08)  | 0.03 | .23     | .203 |
| Auditory processing | 0.01<br>(-0.01-0.02)  | 0.01 | .14     | .273 |

**Supplemental Table 19 FXS - DBC II** Linear model of predictors of DBC II score, with 95% bias corrected and accelerated confidence intervals reported in parentheses. Confidence intervals and standard errors based on 1000 bootstrap samples.

|                     | B (95% CIs)           | SE B | $\beta$ | p    |
|---------------------|-----------------------|------|---------|------|
| <b>Step 1</b>       |                       |      |         |      |
| Constant            | 0.06<br>(-0.12-0.25)  | 0.10 |         | .534 |
| Age                 | 2.08<br>(-0.84-5.23)  | 1.18 | .29     | .183 |
| Adaptive ability    | -0.00<br>(-0.01-0.00) | 0.00 | -.05    | .730 |
| <b>Step 2</b>       |                       |      |         |      |
| Constant            | -0.08<br>(-0.37-0.25) | 0.14 |         | .559 |
| Age                 | 1.43<br>(-1.36-3.84)  | 1.19 | .20     | .319 |
| Adaptive ability    | 0.00<br>(-0.01, 0.01) | 0.00 | .02     | .898 |
| Lifetime health     | 0.01<br>(-0.01, 0.02) | 0.01 | .16     | .302 |
| Current health      | 0.02<br>(-0.01-0.04)  | 0.01 | .24     | .224 |
| Auditory processing | 0.01<br>(-0.00, 0.01) | 0.00 | .18     | .212 |

## Prader-Willi syndrome

**Supplemental Table 20 PWS - Total Anxiety, Depression and Mood score** Linear model of predictors of total anxiety, depression and mood score, with 95% bias corrected and accelerated confidence intervals reported in parentheses. Confidence intervals and standard errors based on 1000 bootstrap samples.

|                     | b                            | SE B   | $\beta$ | p           |
|---------------------|------------------------------|--------|---------|-------------|
| <b>Step 1</b>       |                              |        |         |             |
| Constant            | 52.47<br>(28.56, 74.84)      | 12.96  |         | <b>.001</b> |
| Age                 | -205.17<br>(-500.87, 187.12) | 177.60 | -.23    | .233        |
| Adaptive ability    | -1.41<br>(-2.26, -0.43)      | 0.44   | -.56    | <b>.001</b> |
| <b>Step 2</b>       |                              |        |         |             |
| Constant            | 26.34<br>(-28.50, 77.45)     | 26.78  |         | .358        |
| Age                 | -165.21<br>(-580.73, 335.01) | 195.64 | -.18    | .373        |
| Adaptive ability    | -1.17<br>(-2.28, -0.02)      | 0.59   | -.47    | .052        |
| Lifetime health     | 0.67<br>(-1.05, 2.28)        | 0.88   | .26     | .433        |
| Current health      | -0.33<br>(-2.32, 2.00)       | 0.94   | -.12    | .637        |
| Auditory processing | 1.23<br>(-0.93, 3.56)        | 1.38   | .26     | .377        |

**Supplemental Table 21 PWS - Depressed mood** Linear model of predictors of depressed mood, with 95% bias corrected and accelerated confidence intervals reported in parentheses. Confidence intervals and standard errors based on 1000 bootstrap samples.

|                     | b                           | SE B  | $\beta$ | p           |
|---------------------|-----------------------------|-------|---------|-------------|
| <b>Step 1</b>       |                             |       |         |             |
| Constant            | 15.29<br>(8.74, 21.64)      | 3.10  |         | <b>.001</b> |
| Age                 | -96.68<br>(-170.33, -16.65) | 41.34 | -.41    | .014        |
| Adaptive ability    | -0.36<br>(-0.57, -0.08)     | 0.12  | -.54    | .011        |
| <b>Step 2</b>       |                             |       |         |             |
| Constant            | 1.00<br>(-5.40, 23.97)      | 0.24  |         | .242        |
| Age                 | -92.00<br>(-245.07, 60.67)  | 0.09  | -.39    | .085        |
| Adaptive ability    | -0.32<br>(-0.65, 0.05)      | 0.09  | -.48    | .086        |
| Lifetime health     | 0.38<br>(-0.07, 0.75)       | 0.12  | .55     | .124        |
| Current health      | -0.25<br>(-0.78, 0.45)      | 0.23  | -.33    | .230        |
| Auditory processing | 0.18<br>(-0.40, 0.77)       | 0.64  | .14     | .637        |



**Supplemental Table 22 PWS - General anxiety** Linear model of predictors of generalised anxiety, with 95% bias corrected and accelerated confidence intervals reported in parentheses. Confidence intervals and standard errors based on 1000 bootstrap samples.

|                     | b                           | SE B  | $\beta$ | p           |
|---------------------|-----------------------------|-------|---------|-------------|
| <b>Step 1</b>       |                             |       |         |             |
| Constant            | 12.04<br>(4.28, 19.17)      | 4.19  |         | .011        |
| Age                 | -28.41<br>(-130.98, 79.43)  | 54.42 | -.11    | .588        |
| Adaptive ability    | -0.37<br>(-0.63, -0.04)     | 0.14  | -.52    | <b>.006</b> |
| <b>Step 2</b>       |                             |       |         |             |
| Constant            | 8.21<br>(-9.04, 22.62)      | 8.85  |         | .406        |
| Age                 | -29.07<br>(-170.01, 131.60) | 60.76 | -.11    | .649        |
| Adaptive ability    | -0.35<br>(-0.73, 0.08)      | 0.19  | -.49    | .100        |
| Lifetime health     | 0.38<br>(-0.09, 0.76)       | 0.28  | .52     | .151        |
| Current health      | -0.30<br>(-0.98, 0.50)      | 0.28  | -.37    | .204        |
| Auditory processing | 0.13<br>(-0.50, 0.86)       | 0.40  | .10     | .745        |

**Supplemental Table 23 PWS - Manic Hyperactivity** Linear model of predictors of manic hyperactive, with 95% bias corrected and accelerated confidence intervals reported in parentheses. Confidence intervals and standard errors based on 1000 bootstrap samples.

|                     | b                           | SE B  | $\beta$ | p           |
|---------------------|-----------------------------|-------|---------|-------------|
| <b>Step 1</b>       |                             |       |         |             |
| Constant            | 11.29<br>(4.90, 17.35)      | 3.63  |         | <b>.007</b> |
| Age                 | -14.57<br>(-99.21, 101.16)  | 52.26 | -.06    | .773        |
| Adaptive ability    | -0.38<br>(-0.59, -0.13)     | 0.11  | -.59    | <b>.003</b> |
| <b>Step 2</b>       |                             |       |         |             |
| Constant            | 6.79<br>(-8.41, 19.43)      | 6.91  |         | .362        |
| Age                 | -14.03<br>(-102.74, 113.01) | 52.49 | -.06    | .792        |
| Adaptive ability    | -0.36<br>(-0.61, -0.08)     | 0.13  | -.55    | .029        |
| Lifetime health     | 0.29<br>(-0.11, 0.63)       | 0.22  | .44     | .207        |
| Current health      | -0.25<br>(-0.74, 0.16)      | 0.24  | -.34    | .265        |
| Auditory processing | 0.21<br>(-0.33, 0.91)       | 0.34  | .17     | .537        |

**Supplemental Table 24 PWS - Obsessive compulsive** Linear model of predictors of obsessive compulsive, with 95% bias corrected and accelerated confidence intervals reported in parentheses. Confidence intervals and standard errors based on 1000 bootstrap samples.

|                     | b                        | SE B  | $\beta$ | p    |
|---------------------|--------------------------|-------|---------|------|
| <b>Step 1</b>       |                          |       |         |      |
| Constant            | 5.11<br>(-0.31, 10.89)   | 2.58  |         | .067 |
| Age                 | -9.19<br>(-65.96, 60.38) | 32.52 | -.07    | .777 |
| Adaptive ability    | -0.13<br>(-0.30, 0.01)   | 0.08  | -.36    | .146 |
| <b>Step 2</b>       |                          |       |         |      |
| Constant            | 0.69<br>(-9.02, 7.99)    | 4.51  |         | .886 |
| Age                 | 6.81<br>(-60.67, 97.11)  | 37.47 | .05     | .854 |
| Adaptive ability    | -0.05<br>(-0.26, 0.17)   | 0.11  | -.15    | .615 |
| Lifetime health     | -0.07<br>(-0.33, 0.29)   | 0.14  | -.19    | .595 |
| Current health      | 0.19<br>(-0.24, 0.52)    | 0.16  | .46     | .161 |
| Auditory processing | 0.17<br>(-0.17, 0.55)    | 0.19  | .26     | .341 |

**Supplemental Table 25 PWS - Social Avoidance** Linear model of predictors of social avoidance, with 95% bias corrected and accelerated confidence intervals reported in parentheses. Confidence intervals and standard errors based on 1000 bootstrap samples.

|                     | b                          | SE B  | $\beta$ | p           |
|---------------------|----------------------------|-------|---------|-------------|
| <b>Step 1</b>       |                            |       |         |             |
| Constant            | 11.24<br>(3.41, 18.72)     | 3.80  |         | <b>.009</b> |
| Age                 | -78.81<br>(-159.18, 20.77) | 41.91 | -.34    | .058        |
| Adaptive ability    | -0.26<br>(-0.52, -0.01)    | 0.13  | -.40    | .059        |
| <b>Step 2</b>       |                            |       |         |             |
| Constant            | 4.01<br>(-8.07, 18.25)     | 6.49  |         | .531        |
| Age                 | -60.58<br>(-163.52, 68.22) | 47.80 | -.26    | .186        |
| Adaptive ability    | -0.17<br>(-0.48, 0.14)     | 0.15  | -.27    | .240        |
| Lifetime health     | -0.19<br>(-0.73, 0.22)     | 0.28  | -.29    | .436        |
| Current health      | 0.22<br>(-0.29, 0.94)      | 0.30  | .30     | .346        |
| Auditory processing | 0.43<br>(-0.07, 0.87)      | 0.32  | .35     | .175        |

**Supplemental Table 26 PWS - DBC MIS** Linear model of predictors of DBC MIS, with 95% bias corrected and accelerated confidence intervals reported in parentheses. Confidence intervals and standard errors based on 1000 bootstrap samples.

|                     | b                      | SE B | $\beta$ | p           |
|---------------------|------------------------|------|---------|-------------|
| <b>Step 1</b>       |                        |      |         |             |
| Constant            | 0.90<br>(0.44, 1.31)   | 0.29 |         | <b>.007</b> |
| Age                 | -0.53<br>(-8.57, 9.36) | 4.37 | -.03    | .894        |
| Adaptive ability    | -0.02<br>(-0.04, 0.01) | 0.01 | -.45    | .018        |
| <b>Step 2</b>       |                        |      |         |             |
| Constant            | 0.13<br>(-0.81, 0.84)  | 0.48 |         | .800        |
| Age                 | 1.32<br>(-6.36, 11.74) | 3.97 | .08     | .736        |
| Adaptive ability    | -0.01<br>(-0.04, 0.02) | 0.01 | -.25    | .235        |
| Lifetime health     | 0.01<br>(-0.02, 0.03)  | 0.02 | .25     | .414        |
| Current health      | 0.01<br>(-0.03, 0.09)  | 0.02 | .08     | .739        |
| Auditory processing | 0.03<br>(-0.01, 0.08)  | 0.02 | .34     | .171        |

**Supplemental Table 27 PWS - DBC II** Linear model of predictors of DBC II, with 95% bias corrected and accelerated confidence intervals reported in parentheses. Confidence intervals and standard errors based on 1000 bootstrap samples.

|                     | b                      | SE B | $\beta$ | p    |
|---------------------|------------------------|------|---------|------|
| <b>Step 1</b>       |                        |      |         |      |
| Constant            | 0.15<br>(-0.09, 0.34)  | 0.13 |         | .227 |
| Age                 | 1.36<br>(-1.37, 5.88)  | 1.83 | .20     | .449 |
| Adaptive ability    | -0.01<br>(-0.01, 0.01) | 0.01 | -.27    | .258 |
| <b>Step 2</b>       |                        |      |         |      |
| Constant            | -0.10<br>(-0.41, 0.12) | 0.16 |         | .524 |
| Age                 | 2.01<br>(-0.46, 5.96)  | 1.71 | .30     | .229 |
| Adaptive ability    | -0.00<br>(-0.01, 0.01) | 0.01 | -.09    | .742 |
| Lifetime health     | 0.01<br>(-0.01, 0.01)  | 0.01 | .24     | .488 |
| Current health      | 0.00<br>(-0.01, 0.05)  | 0.01 | .09     | .759 |
| Auditory processing | 0.01<br>(-0.01, 0.03)  | 0.01 | .25     | .229 |
